# Supplementary material for: Dysregulated VEGF/VEGFR-2 Signaling and Plexogenic Lesions in the Embryonic Lungs of Chickens Predisposed to Pulmonary Arterial Hypertension
Source: MDPI journal article supplement (doi:10.3390/ijms25084489), 2024-04-19
Supplement: s1 [file s1]

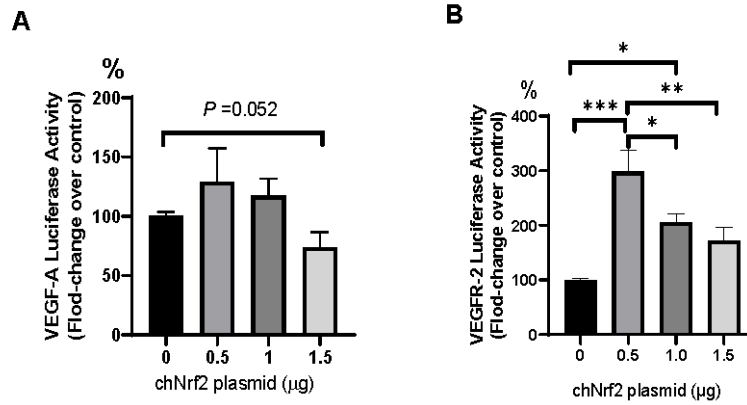

**Figure S3.** Dual luciferase reporter assay for determination of the response of VEGF-A (A) and VEGFR-2 (B) to Nrf2. HEK-293T cells were co-transfected with the chNrf2 expression vector pCMV-EGFP-Nrf2 (denoted in µg of DNA per well of a 12-well plate) and the plasmid constructs containing a firefly luciferase gene under the control of the VEGF-A or VEGFR-2 promoter along with the pRL-TK Renilla. Empty pCMV-EGFP-flag was used as control. Cells were maintained within a humidified 5% CO<sub>2</sub> atmosphere for 72 h before the measurement of luciferase activity. Data are means ± SEM of triplicates and are representative of two independent experiments. \*  $P < 0.05$ , \*\*  $P < 0.01$  and \*\*\*  $P < 0.001$  (one-way ANOVA with Fisher's LSD post-hoc test).
