# Supplementary material for: Dysregulated VEGF/VEGFR-2 Signaling and Plexogenic Lesions in the Embryonic Lungs of Chickens Predisposed to Pulmonary Arterial Hypertension
Source: MDPI journal article supplement (doi:10.3390/ijms25084489), 2024-04-19
Supplement: s1 [file s1]

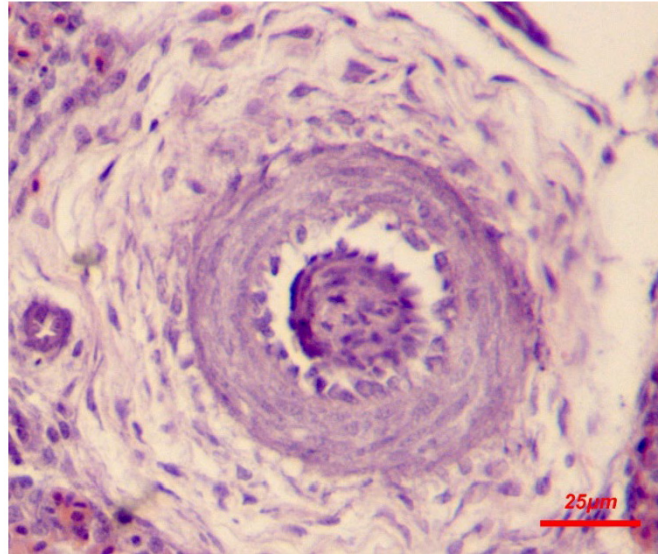

**Figure S1.** Hematoxylin and eosin-stained lung preparation from a broiler chicken at E20 showing medial fibromuscular dysplasia (FMD).
