# Supplementary material for: Dysregulated VEGF/VEGFR-2 Signaling and Plexogenic Lesions in the Embryonic Lungs of Chickens Predisposed to Pulmonary Arterial Hypertension
Source: MDPI journal article supplement (doi:10.3390/ijms25084489), 2024-04-19
Supplement: s1 [file s1]

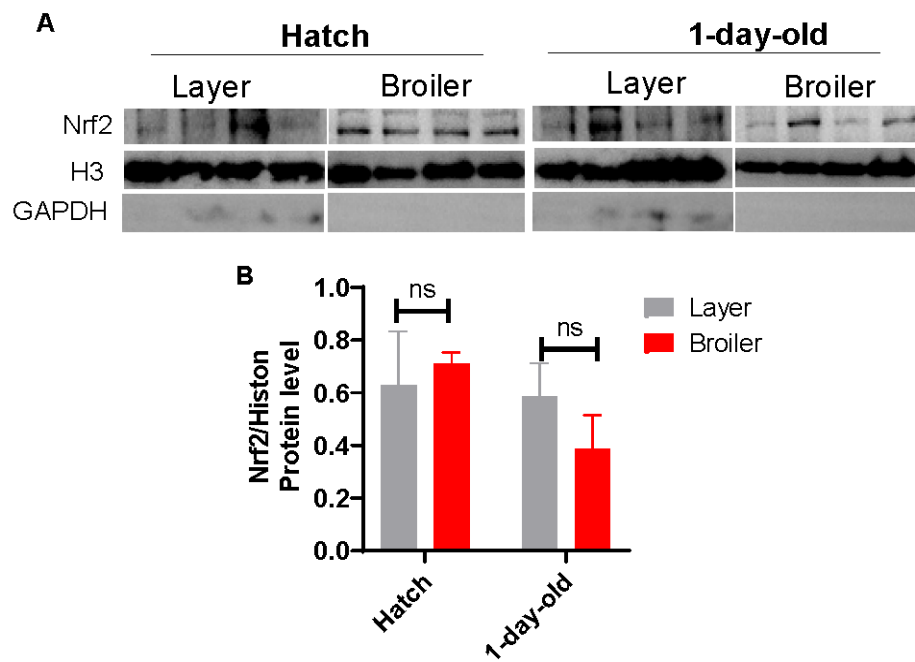

**Figure S2.** Nuclear Nrf2 levels in the lungs of broilers and layers at hatch and 1-day old. (A) The nuclear fraction of whole lung tissue was subjected to Western blot analysis using an anti-Nrf2 antibody, with Histone H3 and GAPDH serving as loading controls. Representative immunoblots are provided. (B) Quantitative analysis of Nrf2. Data are expressed as means  $\pm$  SEM of 4 birds in each group. ns: no significant difference.
